# Supplementary material for: Impact of Gut Microbiota on the Association between Diet and Depressive Symptoms in Breast Cancer
Source: MDPI journal article supplement (doi:10.3390/nu14061186), 2022-03-11
Supplement: s1 [file s1]

**Table S1. Chinese healthy eating index components and standard for scoring**

| Component                    | Score                                            |                                                                                      |                                                        |
|------------------------------|--------------------------------------------------|--------------------------------------------------------------------------------------|--------------------------------------------------------|
|                              | 0                                                | 5                                                                                    | 10                                                     |
| <b>Adequacy</b>              |                                                  |                                                                                      |                                                        |
| Total grains                 | 0                                                |     | $\geq 2.5\text{SP}/1000\text{kcal}$                    |
| Whole grains and mixed beans | 0                                                |     | $\geq 0.6\text{SP}/1000\text{kcal}$                    |
| Tubers                       | 0                                                |     | $\geq 0.3\text{SP}/1000\text{kcal}$                    |
| Total vegetables             | 0                                                |     | $\geq 1.9\text{SP}/1000\text{kcal}$                    |
| Dark vegetables              | 0                                                |     | $\geq 0.9\text{SP}/1000\text{kcal}$                    |
| Fruits                       | 0                                                |    | $\geq 1.1\text{SP}/1000\text{kcal}$                    |
| Dairy                        | 0                                                |   | $\geq 0.5\text{SP}/1000\text{kcal}$                    |
| Soybeans                     | 0                                                |   | $\geq 0.4\text{SP}/1000\text{kcal}$                    |
| Fish and seafood             | 0                                                |   | $\geq 0.6\text{SP}/1000\text{kcal}$                    |
| Poultry                      | 0                                                |   | $\geq 0.3\text{SP}/1000\text{kcal}$                    |
| Eggs                         | 0                                                |   | $\geq 0.5\text{SP}/1000\text{kcal}$                    |
| Seeds and nuts               | 0                                                |   | $\geq 0.4\text{SP}/1000\text{kcal}$                    |
| <b>Limitation</b>            |                                                  |                                                                                      |                                                        |
| Red meat                     | $\geq 3.5$                                       |   | $\leq 0.4\text{SP}/1000\text{kcal}$                    |
| Cooking oils                 | $\geq 32.6$                                      |  | $\leq 15.6\text{g}/1000\text{kcal}$                    |
| Sodium                       | $\geq 3608$                                      |  | $\leq 1000\text{mg}/1000\text{kcal}$                   |
| Added sugars                 | $\geq 20\%$                                      |   | $\leq 10\% \text{ of energy}$                          |
| Alcohol                      | $\geq 25\text{g (men)}$<br>$/15\text{g (women)}$ |   | $\leq 60\text{g}(\text{men})/40\text{g}(\text{women})$ |

Table S2. Characteristics of the non-depressed and depressed breast cancer patients

|                                          | NBC (n = 145) | DBC (n = 60) | <i>t</i> / <i>Z</i> / $\chi^2$ | <i>p</i> -Value  |
|------------------------------------------|---------------|--------------|--------------------------------|------------------|
| <b>Demographic characteristics</b>       |               |              |                                |                  |
| Age (years) <sup>1</sup>                 | 54.0 ± 9.4    | 50.2 ± 10.5  | 2.387                          | <b>0.018</b>     |
| BMI <sup>1</sup>                         | 23.6 ± 3.3    | 23.5 ± 3.0   | 0.287                          | 0.775            |
| Family monthly income (RMB) <sup>2</sup> |               |              |                                |                  |
| <2000                                    | 30 (20.7%)    | 12 (20.0%)   |                                |                  |
| 2000~5000                                | 88 (60.7%)    | 43 (71.7%)   | 3.687                          | 0.158            |
| >5000                                    | 27 (18.6%)    | 5 (8.3%)     |                                |                  |
| Education level <sup>2</sup>             |               |              |                                |                  |
| Primary school and below                 | 33 (22.8%)    | 13 (21.7%)   |                                |                  |
| Middle school                            | 59 (40.7%)    | 23 (38.3%)   |                                |                  |
| High school or secondary school          | 31 (21.4%)    | 10 (16.7%)   | 2.162                          | 0.539            |
| Junior college or above                  | 22 (15.2%)    | 14 (23.3%)   |                                |                  |
| Menopausal status <sup>2</sup>           |               |              |                                |                  |
| Pre-menopausal                           | 51 (35.2%)    | 32 (53.3%)   |                                |                  |
| Post-menopausal                          | 94 (64.8%)    | 28 (46.7%)   | 5.809                          | <b>0.016</b>     |
| Marital status <sup>3</sup>              |               |              |                                |                  |
| Married                                  | 134 (92.4%)   | 56 (93.3%)   |                                |                  |
| Widowed/divorced/separated/single        | 11 (7.6%)     | 4 (6.7%)     | 0.000                          | 1.000            |
| Employment <sup>2</sup>                  |               |              |                                |                  |
| Employed                                 | 38 (26.2%)    | 34 (56.7%)   | 17.818                         | <b>&lt;0.001</b> |

|                                                           |                |                |        |       |
|-----------------------------------------------------------|----------------|----------------|--------|-------|
| Unemployed                                                | 32 (22.1%)     | 10 (16.7%)     | 3.117  | 0.210 |
| Retired                                                   | 75 (51.7%)     | 16 (26.7%)     |        |       |
| Residence <sup>2</sup>                                    |                |                |        |       |
| Urban areas                                               | 64 (44.1%)     | 22 (36.7%)     | 3.117  | 0.210 |
| Towns                                                     | 42 (29.0%)     | 25 (41.7%)     |        |       |
| Rural areas                                               | 39 (26.9%)     | 13 (21.7%)     |        |       |
| Clinical characteristics                                  |                |                |        |       |
| Cancer stage <sup>2</sup>                                 |                |                |        |       |
| I                                                         | 49 (33.8%)     | 17 (28.3%)     | 0.659  | 0.719 |
| II                                                        | 67 (46.2%)     | 29 (48.3%)     |        |       |
| III                                                       | 29 (20.0%)     | 14 (23.3%)     |        |       |
| Type of surgery <sup>2</sup>                              |                |                |        |       |
| Simple mastectomy                                         | 84 (57.9%)     | 31 (51.7%)     | 0.919  | 0.632 |
| Modified radical mastectomy                               | 41 (28.3%)     | 18 (30.0%)     |        |       |
| Breast-conserving surgery                                 | 20 (13.8%)     | 11 (18.3%)     |        |       |
| Blood routine and blood biochemical indexes               |                |                |        |       |
| Red blood cell (×10 <sup>12</sup> /L) <sup>1</sup>        | 3.95 ± 0.41    | 3.95 ± 0.36    | 0.026  | 0.979 |
| White blood cell (×10 <sup>9</sup> /L) <sup>4</sup>       | 5.10 ± 2.09    | 5.56 ± 2.27    | −1.067 | 0.286 |
| Platelet (×10 <sup>9</sup> /L) <sup>1</sup>               | 245.88 ± 68.97 | 244.29 ± 60.05 | 0.138  | 0.890 |
| Hemoglobin (g/L) <sup>1</sup>                             | 122.04 ± 12.43 | 119.92 ± 10.89 | 1.020  | 0.309 |
| Total lymphocyte count (×10 <sup>9</sup> /L) <sup>4</sup> | 1.26 ± 0.37    | 1.29 ± 0.64    | −1.028 | 0.304 |
| Neutrophil (×10 <sup>9</sup> /L) <sup>4</sup>             | 3.36 ± 1.95    | 3.57 ± 1.55    | −0.966 | 0.334 |
| Hypersensitive C-reactive protein (mg/L) <sup>4</sup>     | 3.50 ± 3.02    | 5.15 ± 5.77    | −0.895 | 0.371 |

|                                        |              |              |         |                  |
|----------------------------------------|--------------|--------------|---------|------------------|
| Serum albumin (g/L) <sup>1</sup>       | 43.52 ± 3.03 | 43.14 ± 3.52 | 0.691   | 0.491            |
| Serum globulin (g/L) <sup>1</sup>      | 28.17 ± 3.28 | 26.95 ± 3.91 | 2.008   | <b>0.046</b>     |
| Serum total protein (g/L) <sup>1</sup> | 71.57 ± 4.92 | 70.21 ± 5.20 | 1.562   | 0.120            |
| <b>Score of questionnaires</b>         |              |              |         |                  |
| NRS2002 <sup>4</sup>                   | 1.05 ± 0.23  | 1.14 ± 0.40  | −1.271  | 0.085            |
| KPS <sup>1</sup>                       | 86.40 ± 6.59 | 85.34 ± 7.06 | 1.005   | 0.316            |
| CES-D <sup>1</sup>                     | 7.87 ± 4.07  | 22.27 ± 5.25 | −18.982 | <b>&lt;0.001</b> |
| SAS <sup>1</sup>                       | 34.81 ± 4.67 | 46.45 ± 8.19 | −10.331 | <b>&lt;0.001</b> |

Notes: Data were shown as mean and standard deviation (SD) for continuous variables, and percentages (%) for categorical variables. <sup>1</sup> Independent Samples *t*-Test; <sup>2</sup> Chi-square test; <sup>3</sup> Chi-squared test with continuity correction; <sup>4</sup> Mann-Whitney test. DBC, depressed breast cancer patients; NBC, non-depressed breast cancer patients; BMI, body mass index; NRS2002, Nutritional Risk Screening 2002; KPS, Karnofsky performance status; CES-D, Center for Epidemiologic Studies Depression; SAS, Self-rating Anxiety Scale.

**Table S3. Correlation between CES-D score and nutrient intakes, CHEI component scores (n = 205)**

| <b>Variables</b>           | <b>r</b> | <b>p-Value</b>   | <b>Variables</b>              | <b>r</b> | <b>p-Value</b> |
|----------------------------|----------|------------------|-------------------------------|----------|----------------|
| Energy <sup>1</sup>        | −0.187   | <b>0.010</b>     | Potassium <sup>1</sup>        | −0.222   | <b>0.002</b>   |
| Protein <sup>1</sup>       | −0.200   | <b>0.006</b>     | Iron <sup>2</sup>             | −0.229   | <b>0.002</b>   |
| Dietary fiber <sup>1</sup> | −0.205   | <b>0.005</b>     | Zinc <sup>1</sup>             | −0.201   | <b>0.006</b>   |
| Vitamin A <sup>2</sup>     | −0.239   | <b>0.001</b>     | Selenium <sup>1</sup>         | −0.252   | <b>0.001</b>   |
| Vitamin B2 <sup>2</sup>    | −0.240   | <b>0.001</b>     | Manganese <sup>2</sup>        | −0.186   | <b>0.011</b>   |
| Niacin <sup>2</sup>        | −0.179   | <b>0.014</b>     | Tryptophan <sup>1</sup>       | −0.168   | <b>0.027</b>   |
| Calcium <sup>1</sup>       | −0.145   | <b>0.048</b>     | Total CHEI score <sup>1</sup> | −0.201   | <b>0.007</b>   |
| Phosphorus <sup>1</sup>    | −0.254   | <b>&lt;0.001</b> | Fruits <sup>2</sup>           | −0.155   | <b>0.039</b>   |

Notes: CES-D, Center for Epidemiologic Studies Depression; CHEI, Chinese Healthy Eating Index.<sup>1</sup>

Pearson correlation analysis; <sup>2</sup> Spearman correlation analysis.

**Table S4. Plasma amino acids of the depressed and non-depressed breast cancer patients**

| <b>Amino acid<br/>(<math>\mu\text{mol/L}</math>)</b> | <b>NBC (n = 46)</b> | <b>DBC (n = 17)</b> | <b><i>t</i></b> | <b><i>p</i>-Value</b> |
|------------------------------------------------------|---------------------|---------------------|-----------------|-----------------------|
| Tryptophan                                           | 43.37 $\pm$ 6.07    | 40.10 $\pm$ 4.39    | 2.023           | <b>0.047</b>          |
| Tyrosine                                             | 77.50 $\pm$ 9.42    | 70.12 $\pm$ 15.35   | 1.140           | 0.275                 |
| Valine                                               | 224.68 $\pm$ 18.39  | 222.17 $\pm$ 29.62  | 0.200           | 0.844                 |
| Phenylalanine                                        | 59.96 $\pm$ 7.21    | 61.49 $\pm$ 18.25   | −0.219          | 0.830                 |
| Isoleucine                                           | 69.30 $\pm$ 8.52    | 72.22 $\pm$ 7.42    | −0.701          | 0.495                 |
| Leucine                                              | 124.04 $\pm$ 12.98  | 126.19 $\pm$ 22.66  | −0.230          | 0.822                 |
| TRP/LNAAs                                            | 0.078 $\pm$ 0.010   | 0.076 $\pm$ 0.018   | 0.266           | 0.798                 |

Notes: Data were shown as mean and standard deviation (SD) for continuous variable. DBC, depressed breast cancer patients; NBC, non-depressed breast cancer patients; TRP/LNAAs: tryptophan / large neutral amino acids.

**Table S5. Differences of gut microbiota composition between the depressed and non-depressed breast cancer patients at the phylum level.**

| Species name                          | DBC       |          | NBC       |          | <i>p</i> -Value | Corrected <i>p</i> -Value | Lower ci   | Upper ci   | Effect size |
|---------------------------------------|-----------|----------|-----------|----------|-----------------|---------------------------|------------|------------|-------------|
|                                       | Mean (%)  | SD (%)   | Mean (%)  | SD (%)   |                 |                           |            |            |             |
| p__Firmicutes                         | 52.91     | 26.4     | 69.05     | 22.92    | 0.028           | 0.196                     | -30.32     | -3.399     | -16.14      |
| p__Proteobacteria                     | 31.68     | 29.13    | 12.6      | 21.35    | 0.01114         | 0.156                     | 4.209      | 35.36      | 19.09       |
| p__Actinobacteriota                   | 7.283     | 7.953    | 9.285     | 11.86    | 0.6345          | 0.6874                    | -7.255     | 3.17       | -2.002      |
| p__Bacteroidetes                      | 7.073     | 9.377    | 8.791     | 14.67    | 0.572           | 0.6874                    | -8.237     | 4.774      | -1.718      |
| p__Fusobacteriota                     | 0.866     | 3.371    | 0.01561   | 0.04069  | 0.4105          | 0.6874                    | -0.01593   | 2.52       | 0.8504      |
| p__Cyanobacteria                      | 0.007777  | 0.02551  | 0.1195    | 0.6685   | 0.3024          | 0.6874                    | -0.3372    | 0.009154   | -0.1117     |
| p__Patescibacteria                    | 0.08225   | 0.1315   | 0.04001   | 0.05147  | 0.364           | 0.6874                    | -0.01365   | 0.112      | 0.04223     |
| p__Desulfobacterota                   | 0.05969   | 0.1327   | 0.03566   | 0.06306  | 0.5383          | 0.6874                    | -0.0289    | 0.09839    | 0.02403     |
| p__Verrucomicrobiota                  | 0.01944   | 0.06822  | 0.04663   | 0.1565   | 0.4126          | 0.6874                    | -0.08971   | 0.02777    | -0.02719    |
| p__unclassified_k__norank_d__Bacteria | 0.008944  | 0.01933  | 0.008891  | 0.01569  | 0.5426          | 0.6874                    | -0.00897   | 0.01137    | 5.27E-05    |
| p__Synergistota                       | 0.0003889 | 0.00165  | 0.0035    | 0.01066  | 0.1831          | 0.6874                    | -0.007189  | -0.0001682 | -0.003111   |
| p__Campilobacterota                   | 0.001361  | 0.005774 | 0.0003784 | 0.001376 | 0.7957          | 0.7957                    | -0.0007568 | 0.003894   | 0.0009827   |
| p__Caldatibacteriota                  | 0.0003889 | 0.00165  | 0.0002838 | 0.001726 | 0.6383          | 0.6874                    | -0.0008514 | 0.001167   | 0.0001051   |
| p__Chloroflexi                        | 0         | 0        | 0.0003784 | 0.002301 | 0.5101          | 0.6874                    | -0.001135  | 0          | -0.0003784  |

Notes: Wilcoxon rank-sum test was used corrected for multiple testing using the Benjamini-Hochberg FDR method. DBC, depressed breast cancer patients ( $n = 18$ );

NBC, non-depressed breast cancer patients ( $n = 37$ ).



**Table S6. Differences of gut microbiota composition between the depressed and non-depressed breast cancer patients at the genus level.**

| Species name                              | DBC      |        | NBC      |        | <i>p</i> -Value | Corrected <i>p</i> -Value | Lower ci | Upper ci | Effect size |
|-------------------------------------------|----------|--------|----------|--------|-----------------|---------------------------|----------|----------|-------------|
|                                           | Mean (%) | SD (%) | Mean (%) | SD (%) |                 |                           |          |          |             |
| <i>g__Escherichia-Shigella</i>            | 27.14    | 28.2   | 9.428    | 19.31  | 0.009772        | 0.2065                    | 4.719    | 32.44    | 17.71       |
| <i>g__Blautia</i>                         | 9.127    | 8.672  | 16.75    | 13.9   | 0.02674         | 0.3131                    | -13.15   | -1.582   | -7.624      |
| <i>g__Streptococcus</i>                   | 5.857    | 8.626  | 5.102    | 9.548  | 0.6931          | 0.8695                    | -4.528   | 6.138    | 0.7551      |
| <i>g__Eubacterium_hallii_group</i>        | 4.415    | 7.645  | 5.973    | 6.28   | 0.08012         | 0.441                     | -5.256   | 2.559    | -1.558      |
| <i>g__Bacteroides</i>                     | 5.687    | 9.002  | 3.651    | 6.674  | 0.7265          | 0.8706                    | -2.139   | 6.769    | 2.036       |
| <i>g__Bifidobacterium</i>                 | 3.574    | 4.397  | 5.644    | 10.64  | 0.6731          | 0.8559                    | -6.365   | 1.371    | -2.07       |
| <i>g__Faecalibacterium</i>                | 4.029    | 7.084  | 4.957    | 6.375  | 0.1341          | 0.5454                    | -4.708   | 3.111    | -0.9285     |
| <i>g__Subdoligranulum</i>                 | 3.747    | 6.597  | 2.861    | 3.653  | 0.3148          | 0.6833                    | -1.856   | 4.088    | 0.886       |
| <i>g__Romboutsia</i>                      | 4.18     | 6.009  | 2.023    | 2.697  | 0.9499          | 1                         | -0.6962  | 5.272    | 2.156       |
| <i>g__Prevotella</i>                      | 0.8341   | 1.719  | 3.849    | 10.67  | 0.9928          | 1                         | -6.933   | -0.04011 | -3.015      |
| <i>g__Collinsella</i>                     | 2.586    | 5.11   | 1.698    | 2.524  | 0.6131          | 0.8238                    | -1.077   | 3.809    | 0.8887      |
| <i>g__unclassified_f__Lachnospiraceae</i> | 1.915    | 4.043  | 1.685    | 1.619  | 0.2622          | 0.6429                    | -1.176   | 2.52     | 0.2306      |
| <i>g__Haemophilus</i>                     | 2.109    | 8.887  | 1.249    | 4.452  | 0.7217          | 0.8706                    | -2.279   | 5.742    | 0.8596      |
| <i>g__Anaerostipes</i>                    | 1.026    | 2.339  | 2.278    | 3.775  | 0.04449         | 0.3379                    | -2.914   | 0.4128   | -1.252      |

|                                                         |        |        |        |        |          |        |         |         |         |
|---------------------------------------------------------|--------|--------|--------|--------|----------|--------|---------|---------|---------|
| <i>g__Agathobacter</i>                                  | 2.021  | 4.946  | 1.266  | 2.123  | 0.1455   | 0.5454 | -1.231  | 3.374   | 0.7547  |
| <i>g__Ruminococcus</i>                                  | 1.364  | 3.016  | 1.891  | 3.659  | 0.1034   | 0.501  | -2.379  | 1.374   | -0.5269 |
| <i>g__Megamonas</i>                                     | 2.371  | 7.688  | 0.8753 | 4.484  | 0.9825   | 1      | -1.823  | 5.644   | 1.496   |
| <i>g__Fusicatenibacter</i>                              | 1.116  | 2.136  | 1.699  | 3.511  | 0.1811   | 0.5786 | -2.159  | 0.8525  | -0.5831 |
| <i>g__Lactobacillus</i>                                 | 0.6142 | 1.509  | 2.126  | 5.526  | 0.7186   | 0.8706 | -3.593  | 0.1364  | -1.512  |
| <i>g__Dorea</i>                                         | 0.8526 | 0.8298 | 1.69   | 1.685  | 0.05725  | 0.3888 | -1.507  | -0.2176 | -0.837  |
| <i>g__Enterococcus</i>                                  | 1.853  | 4.341  | 0.59   | 2.287  | 0.8113   | 0.8905 | -0.571  | 3.522   | 1.263   |
| <i>g__Lachnoclostridium</i>                             | 1.234  | 3.566  | 1.095  | 3.868  | 0.5184   | 0.7918 | -1.89   | 2.283   | 0.1396  |
| <i>g__Klebsiella</i>                                    | 1.375  | 3.572  | 0.79   | 2.948  | 0.3487   | 0.6999 | -1.205  | 2.671   | 0.5852  |
| <i>g__Ruminococcus_torques_group</i>                    | 0.4276 | 0.6467 | 1.711  | 2.5    | 0.006054 | 0.189  | -2.168  | -0.5185 | -1.283  |
| <i>g__Clostridium_sensu_stricto_1</i>                   | 0.5959 | 0.9136 | 0.9402 | 1.814  | 0.6203   | 0.8238 | -1.14   | 0.3357  | -0.3442 |
| <i>g__unclassified_f__Enterobacteriaceae</i>            | 0.943  | 2.192  | 0.577  | 1.822  | 0.7003   | 0.8706 | -0.7301 | 1.595   | 0.366   |
| <i>g__norank_f__Eubacterium_coprostanoligenes_group</i> | 0.1085 | 0.1879 | 1.332  | 2.727  | 0.003586 | 0.175  | -2.183  | -0.5007 | -1.223  |
| <i>g__Monoglobus</i>                                    | 0.3881 | 0.5445 | 0.9222 | 2.709  | 0.6214   | 0.8238 | -1.619  | 0.1822  | -0.5341 |
| <i>g__Lachnospiraceae_NK4A136_group</i>                 | 0.1064 | 0.1749 | 1.114  | 2.176  | 0.004625 | 0.175  | -1.776  | -0.3822 | -1.007  |
| <i>g__Adlercreutzia</i>                                 | 0.1935 | 0.3516 | 0.8825 | 1.503  | 0.003005 | 0.175  | -1.243  | -0.2103 | -0.6891 |
| <i>g__Ruminococcus_gnavus_group</i>                     | 0.7105 | 1.369  | 0.3014 | 0.8533 | 0.1674   | 0.5534 | -0.2289 | 1.184   | 0.4092  |
| <i>g__Coprococcus</i>                                   | 0.2957 | 0.464  | 0.6013 | 0.9739 | 0.03911  | 0.3379 | -0.6832 | 0.03363 | -0.3056 |

|                                                     |          |         |         |         |         |        |          |          |          |
|-----------------------------------------------------|----------|---------|---------|---------|---------|--------|----------|----------|----------|
| <i>g__Erysipelotrichaceae_UCG-003</i>               | 0.125    | 0.2604  | 0.7705  | 1.624   | 0.01506 | 0.2341 | -1.259   | -0.2303  | -0.6455  |
| <i>g__Fusobacterium</i>                             | 0.8637   | 3.371   | 0.01466 | 0.04071 | 0.2282  | 0.5883 | -0.01605 | 2.444    | 0.849    |
| <i>g__Roseburia</i>                                 | 0.4068   | 0.8952  | 0.3723  | 0.4644  | 0.123   | 0.5454 | -0.3295  | 0.5375   | 0.03446  |
| <i>g__Alistipes</i>                                 | 0.1563   | 0.3657  | 0.5304  | 1.435   | 0.08935 | 0.465  | -0.9609  | 0.0251   | -0.374   |
| <i>g__UCG-002</i>                                   | 0.07641  | 0.1952  | 0.5955  | 1.129   | 0.00403 | 0.175  | -0.8794  | -0.1728  | -0.5191  |
| <i>g__Phascolarctobacterium</i>                     | 0.1985   | 0.4243  | 0.454   | 1.903   | 0.3038  | 0.6775 | -1.008   | 0.1962   | -0.2556  |
| <i>g__Ruminococcus_gauvreauii_group</i>             | 0.1674   | 0.2304  | 0.4335  | 0.8187  | 0.1749  | 0.5716 | -0.5598  | -0.02919 | -0.2661  |
| <i>g__Intestinibacter</i>                           | 0.335    | 0.6981  | 0.2604  | 0.5451  | 0.6597  | 0.8426 | -0.2455  | 0.4458   | 0.07458  |
| <i>g__Turicibacter</i>                              | 0.1814   | 0.3029  | 0.4055  | 1.86    | 0.5634  | 0.8202 | -0.9024  | 0.2113   | -0.224   |
| <i>g__Eggerthella</i>                               | 0.336    | 0.6117  | 0.1908  | 0.2391  | 0.7946  | 0.8803 | -0.107   | 0.4361   | 0.1452   |
| <i>g__Dialister</i>                                 | 0.4206   | 0.9778  | 0.09033 | 0.2204  | 0.7642  | 0.8775 | -0.0558  | 0.8075   | 0.3302   |
| <i>g__norank_f__Coriobacteriales_Incertae_Sedis</i> | 0.1859   | 0.5472  | 0.3239  | 1.216   | 0.2827  | 0.6621 | -0.6181  | 0.3028   | -0.138   |
| <i>g__Christensenellaceae_R-7_group</i>             | 0.0628   | 0.1048  | 0.4263  | 0.7082  | 0.02938 | 0.3232 | -0.6089  | -0.1438  | -0.3635  |
| <i>g__Parabacteroides</i>                           | 0.2182   | 0.3662  | 0.2281  | 0.3405  | 0.2161  | 0.5883 | -0.2094  | 0.2187   | -0.01001 |
| <i>g__norank_f__Lachnospiraceae</i>                 | 0.1277   | 0.2394  | 0.3038  | 0.5503  | 0.06073 | 0.3888 | -0.3905  | 0.01609  | -0.1761  |
| <i>g__Butyrivibrio</i>                              | 0.1845   | 0.3041  | 0.2447  | 0.3239  | 0.1388  | 0.5454 | -0.2205  | 0.1201   | -0.06019 |
| <i>g__Holdemanella</i>                              | 0.008555 | 0.02516 | 0.3968  | 1.141   | 0.2801  | 0.6621 | -0.8161  | -0.07414 | -0.3882  |
| <i>g__Erysipelatoclostridium</i>                    | 0.2535   | 0.6312  | 0.1174  | 0.3734  | 0.1459  | 0.5454 | -0.1284  | 0.4644   | 0.1361   |

|                                                  |           |          |         |        |           |         |          |           |           |
|--------------------------------------------------|-----------|----------|---------|--------|-----------|---------|----------|-----------|-----------|
| <i>g__Veillonella</i>                            | 0.02994   | 0.04625  | 0.3279  | 1.69   | 0.6146    | 0.8238  | -0.8747  | 0.0099    | -0.2981   |
| <i>g__unclassified_f__Peptostreptococcaceae</i>  | 0.1966    | 0.2731   | 0.16    | 0.1991 | 0.7732    | 0.8785  | -0.1057  | 0.1759    | 0.03662   |
| <i>g__Hungatella</i>                             | 0.1589    | 0.3981   | 0.1738  | 0.5897 | 0.5428    | 0.8028  | -0.2852  | 0.2484    | -0.0149   |
| <i>g__Slackia</i>                                | 0.09099   | 0.3834   | 0.1968  | 0.8486 | 0.1034    | 0.501   | -0.4803  | 0.1924    | -0.1059   |
| <i>g__Lachnospiraceae_UCG-001</i>                | 0.01517   | 0.03192  | 0.2278  | 0.7166 | 0.0299    | 0.3232  | -0.4761  | -0.03117  | -0.2126   |
| <i>g__norank_f__Ruminococcaceae</i>              | 0.03636   | 0.04694  | 0.1996  | 0.254  | 0.0002247 | 0.04863 | -0.2539  | -0.08807  | -0.1632   |
| <i>g__Eubacterium_eligens_group</i>              | 0.07602   | 0.2418   | 0.1587  | 0.4139 | 0.1414    | 0.5454  | -0.2592  | 0.09478   | -0.08271  |
| <i>g__unclassified_p__Firmicutes</i>             | 0.126     | 0.2897   | 0.1086  | 0.2551 | 0.5835    | 0.8238  | -0.1174  | 0.191     | 0.01742   |
| <i>g__norank_f__norank_o__Clostridia_UCG-014</i> | 0.03364   | 0.1045   | 0.1896  | 0.4861 | 0.1386    | 0.5454  | -0.3158  | -0.002462 | -0.1559   |
| <i>g__Barnesiella</i>                            | 0.009916  | 0.03947  | 0.2108  | 0.9743 | 0.1079    | 0.5122  | -0.5641  | 0.008839  | -0.2009   |
| <i>g__Eubacterium_ventriosum_group</i>           | 0.05327   | 0.1492   | 0.1621  | 0.3178 | 0.01175   | 0.2065  | -0.2333  | 0.003694  | -0.1088   |
| <i>g__Eisenbergiella</i>                         | 0.0453    | 0.1048   | 0.1587  | 0.5741 | 0.9567    | 1       | -0.3452  | 0.03866   | -0.1134   |
| <i>g__Parasutterella</i>                         | 0.09449   | 0.2676   | 0.09554 | 0.2263 | 0.1575    | 0.5454  | -0.1331  | 0.1567    | -0.001057 |
| <i>g__Lactococcus</i>                            | 0.09488   | 0.2683   | 0.09118 | 0.3923 | 0.775     | 0.8785  | -0.178   | 0.1806    | 0.003705  |
| <i>g__Catenibacterium</i>                        | 0.1427    | 0.4295   | 0.03992 | 0.2049 | 0.1833    | 0.5786  | -0.0602  | 0.3289    | 0.1028    |
| <i>g__Comamonas</i>                              | 0.0005833 | 0.001342 | 0.1748  | 0.879  | 0.6532    | 0.8381  | -0.49    | 0.0006832 | -0.1742   |
| <i>g__unclassified_o__Lactobacillales</i>        | 0.07213   | 0.1874   | 0.09639 | 0.2678 | 0.8867    | 0.951   | -0.1407  | 0.1054    | -0.02425  |
| <i>g__Flavonifractor</i>                         | 0.09702   | 0.243    | 0.07094 | 0.1674 | 1         | 1       | -0.07622 | 0.1643    | 0.02608   |

|                                           |           |          |         |         |           |         |          |          |          |
|-------------------------------------------|-----------|----------|---------|---------|-----------|---------|----------|----------|----------|
| <i>g__Paraprevotella</i>                  | 0.01089   | 0.03151  | 0.1472  | 0.553   | 0.1889    | 0.5786  | -0.3391  | -0.01416 | -0.1363  |
| <i>g__Weissella</i>                       | 0.02392   | 0.06421  | 0.1314  | 0.7217  | 0.7341    | 0.8706  | -0.3549  | 0.03468  | -0.1075  |
| <i>g__Actinomyces</i>                     | 0.09508   | 0.1443   | 0.05798 | 0.07898 | 0.6215    | 0.8238  | -0.02621 | 0.1206   | 0.03709  |
| <i>g__unclassified_f__Ruminococcaceae</i> | 0.05619   | 0.08342  | 0.09676 | 0.1219  | 0.03968   | 0.3379  | -0.09431 | 0.01151  | -0.04058 |
| <i>g__unclassified_c__Clostridia</i>      | 0.04589   | 0.07677  | 0.102   | 0.1275  | 0.06442   | 0.4023  | -0.1111  | -0.00447 | -0.05608 |
| <i>g__UBA1819</i>                         | 0.04278   | 0.1127   | 0.08579 | 0.1199  | 0.01583   | 0.2341  | -0.1017  | 0.02598  | -0.04302 |
| <i>g__norank_f__Oscillospiraceae</i>      | 0.02586   | 0.08235  | 0.1015  | 0.1463  | 0.0003461 | 0.04863 | -0.1433  | -0.01645 | -0.07564 |
| <i>g__norank_f__norank_o__Chloroplast</i> | 0.007777  | 0.02551  | 0.1195  | 0.6685  | 0.3024    | 0.6775  | -0.3378  | 0.008462 | -0.1117  |
| <i>g__Eubacterium_siraeum_group</i>       | 0.0007777 | 0.002264 | 0.1261  | 0.3241  | 0.0327    | 0.3379  | -0.2362  | -0.03585 | -0.1253  |
| <i>g__Family_XIII_AD3011_group</i>        | 0.02664   | 0.03212  | 0.09989 | 0.1714  | 0.03538   | 0.3379  | -0.1342  | -0.02385 | -0.07325 |
| <i>g__Marvinbryantia</i>                  | 0.03189   | 0.04391  | 0.077   | 0.08406 | 0.01739   | 0.2443  | -0.08036 | -0.01242 | -0.04511 |
| <i>g__Eubacterium_brachy_group</i>        | 0.01264   | 0.03429  | 0.08286 | 0.1519  | 0.01176   | 0.2065  | -0.124   | -0.02491 | -0.07023 |
| <i>g__Eubacterium_xylanophilum_group</i>  | 0.001167  | 0.004949 | 0.09374 | 0.3236  | 0.06088   | 0.3888  | -0.2065  | -0.01018 | -0.09255 |
| <i>g__Alloprevotella</i>                  | 0.06339   | 0.2646   | 0.02998 | 0.09305 | 0.8404    | 0.9154  | -0.05247 | 0.1694   | 0.03337  |
| <i>g__Senegalimassilia</i>                | 0.04978   | 0.1285   | 0.04152 | 0.1682  | 0.7146    | 0.8706  | -0.06961 | 0.08705  | 0.008252 |
| <i>g__NK4A214_group</i>                   | 0.0105    | 0.03013  | 0.07548 | 0.1254  | 0.0203    | 0.2717  | -0.1125  | -0.02349 | -0.06499 |
| <i>g__Proteus</i>                         | 0.0009722 | 0.002892 | 0.08191 | 0.4959  | 0.7462    | 0.8706  | -0.2446  | 0.001866 | -0.08095 |
| <i>g__Lachnospiraceae_NC2004_group</i>    | 0.03364   | 0.07174  | 0.04815 | 0.06788 | 0.08161   | 0.441   | -0.04986 | 0.02718  | -0.01451 |

|                                               |           |          |         |         |         |        |           |           |          |
|-----------------------------------------------|-----------|----------|---------|---------|---------|--------|-----------|-----------|----------|
| <i>g__unclassified_c__Gammaproteobacteria</i> | 0         | 0        | 0.08135 | 0.4948  | 0.5101  | 0.7918 | -0.244    | 0         | -0.08135 |
| <i>g__Tyzzerella</i>                          | 0.04005   | 0.1079   | 0.04105 | 0.1684  | 0.7059  | 0.8706 | -0.0764   | 0.07473   | -0.001   |
| <i>g__Rothia</i>                              | 0.06008   | 0.1257   | 0.01977 | 0.03502 | 0.1466  | 0.5454 | -0.005676 | 0.1041    | 0.04031  |
| <i>g__Acinetobacter</i>                       | 0.0009722 | 0.001613 | 0.0787  | 0.474   | 0.5491  | 0.8078 | -0.2341   | 0.0008934 | -0.07773 |
| <i>g__Olsenella</i>                           | 0.008166  | 0.01176  | 0.07132 | 0.3148  | 0.2081  | 0.5883 | -0.1721   | 0.005602  | -0.06315 |
| <i>g__UCG-005</i>                             | 0.01283   | 0.03599  | 0.06583 | 0.1065  | 0.01009 | 0.2065 | -0.0956   | -0.019    | -0.053   |
| <i>g__Odoribacter</i>                         | 0.01614   | 0.0449   | 0.05997 | 0.1934  | 0.1367  | 0.5454 | -0.1115   | 0.01003   | -0.04383 |
| <i>g__Granulicatella</i>                      | 0.04647   | 0.0617   | 0.02771 | 0.03807 | 0.2239  | 0.5883 | -0.00794  | 0.05027   | 0.01875  |
| <i>g__Eubacterium_ruminantium_group</i>       | 0.01011   | 0.03651  | 0.06328 | 0.1199  | 0.07683 | 0.4357 | -0.1002   | -0.01312  | -0.05317 |
| <i>g__Bilophila</i>                           | 0.05386   | 0.114    | 0.01636 | 0.0286  | 0.6302  | 0.8287 | -0.007599 | 0.09587   | 0.0375   |
| <i>g__Oscillibacter</i>                       | 0.02294   | 0.06796  | 0.04625 | 0.06723 | 0.07066 | 0.4317 | -0.0568   | 0.02181   | -0.02331 |
| <i>g__Lachnospira</i>                         | 0.01186   | 0.01825  | 0.05581 | 0.1406  | 0.2066  | 0.5883 | -0.09831  | -0.007794 | -0.04395 |
| <i>g__Akkermansia</i>                         | 0.01944   | 0.06822  | 0.04654 | 0.1565  | 0.5185  | 0.7918 | -0.08787  | 0.03001   | -0.0271  |
| <i>g__Gordonibacter</i>                       | 0.01808   | 0.02882  | 0.04616 | 0.1295  | 0.9704  | 1      | -0.07731  | 0.008776  | -0.02808 |
| <i>g__Faecalitalea</i>                        | 0.008166  | 0.02297  | 0.05571 | 0.2413  | 0.2489  | 0.6301 | -0.1373   | 0.005943  | -0.04754 |
| <i>g__Clostridium_innocuum_group</i>          | 0.03986   | 0.07207  | 0.02327 | 0.05101 | 0.9927  | 1      | -0.01547  | 0.05915   | 0.01659  |
| <i>g__Sellimonas</i>                          | 0.02275   | 0.08162  | 0.03831 | 0.09326 | 0.4784  | 0.7918 | -0.05967  | 0.03863   | -0.01556 |
| <i>g__TM7x</i>                                | 0.03539   | 0.05719  | 0.02469 | 0.04277 | 0.481   | 0.7918 | -0.01613  | 0.04279   | 0.0107   |

|                                                     |          |          |          |          |          |        |           |           |           |
|-----------------------------------------------------|----------|----------|----------|----------|----------|--------|-----------|-----------|-----------|
| <i>g__unclassified_f__Oscillospiraceae</i>          | 0.002139 | 0.004006 | 0.0559   | 0.1881   | 0.008927 | 0.2065 | -0.1204   | -0.008913 | -0.05376  |
| <i>g__CAG-352</i>                                   | 0.02567  | 0.108    | 0.02828  | 0.1553   | 0.4857   | 0.7918 | -0.07535  | 0.074     | -0.002612 |
| <i>g__UCG-003</i>                                   | 0.02197  | 0.04972  | 0.02762  | 0.05799  | 0.5345   | 0.8028 | -0.03242  | 0.02284   | -0.005649 |
| <i>g__Butyricimonas</i>                             | 0.02022  | 0.04947  | 0.02923  | 0.06318  | 0.07752  | 0.4357 | -0.03689  | 0.02113   | -0.009008 |
| <i>g__unclassified_f__Streptococcaceae</i>          | 0.0245   | 0.04879  | 0.02431  | 0.1221   | 0.09238  | 0.472  | -0.05213  | 0.04144   | 0.0001897 |
| <i>g__norank_f__norank_o__RF39</i>                  | 0.00175  | 0.007424 | 0.0455   | 0.1208   | 0.04308  | 0.3379 | -0.08698  | -0.01078  | -0.04375  |
| <i>g__norank_f__Muribaculaceae</i>                  | 0.003305 | 0.01167  | 0.04124  | 0.1913   | 0.3237   | 0.6833 | -0.1083   | 0.001051  | -0.03794  |
| <i>g__Lachnospiraceae_UCG-004</i>                   | 0.003111 | 0.005354 | 0.0385   | 0.1429   | 0.256    | 0.6365 | -0.08759  | -0.004293 | -0.03539  |
| <i>g__norank_f__Saccharimonadaceae</i>              | 0.03247  | 0.06736  | 0.008513 | 0.009814 | 0.09428  | 0.4731 | 0.0005877 | 0.06232   | 0.02396   |
| <i>g__unclassified_o__Coriobacteriales</i>          | 0.02703  | 0.1138   | 0.007    | 0.02267  | 0.2807   | 0.6621 | -0.01229  | 0.07804   | 0.02003   |
| <i>g__Negativibacillus</i>                          | 0.01905  | 0.07997  | 0.01126  | 0.03373  | 0.2054   | 0.5883 | -0.02023  | 0.0494    | 0.007798  |
| <i>g__Raoultibacter</i>                             | 0.0035   | 0.006684 | 0.02469  | 0.05721  | 0.03499  | 0.3379 | -0.04415  | -0.006406 | -0.02119  |
| <i>g__Fructobacillus</i>                            | 0        | 0        | 0.02724  | 0.1657   | 0.5101   | 0.7918 | -0.08173  | 0         | -0.02724  |
| <i>g__CAG-56</i>                                    | 0.007388 | 0.01113  | 0.01949  | 0.03084  | 0.2631   | 0.6429 | -0.02422  | -0.00206  | -0.0121   |
| <i>g__Gemella</i>                                   | 0.01769  | 0.03347  | 0.009081 | 0.0112   | 0.8616   | 0.9345 | -0.004136 | 0.02486   | 0.008613  |
| <i>g__Fenollaria</i>                                | 0.01867  | 0.04225  | 0.00681  | 0.01942  | 0.2979   | 0.675  | -0.005796 | 0.03396   | 0.01186   |
| <i>g__Desulfovibrio</i>                             | 0.005833 | 0.02306  | 0.01892  | 0.04702  | 0.1882   | 0.5786 | -0.03091  | 0.00455   | -0.01309  |
| <i>g__unclassified_f__Erysipelatoclostridiaceae</i> | 0        | 0        | 0.02431  | 0.1473   | 0.3331   | 0.6833 | -0.07284  | 0         | -0.02431  |

|                                                 |           |           |          |          |          |        |           |            |           |
|-------------------------------------------------|-----------|-----------|----------|----------|----------|--------|-----------|------------|-----------|
| <i>g__Mogibacterium</i>                         | 0.0007777 | 0.001919  | 0.02308  | 0.1292   | 0.04658  | 0.3445 | -0.06526  | -0.0001524 | -0.0223   |
| <i>g__unclassified_c__Bacilli</i>               | 0.0001944 | 0.0008249 | 0.02308  | 0.1345   | 0.5058   | 0.7918 | -0.06773  | 9.98E-05   | -0.02289  |
| <i>g__Lachnospiraceae_UCG-010</i>               | 0.003889  | 0.009595  | 0.0193   | 0.07747  | 0.07373  | 0.4357 | -0.04521  | 0.001403   | -0.01541  |
| <i>g__Lachnospiraceae_ND3007_group</i>          | 0.01342   | 0.02431   | 0.009743 | 0.01439  | 0.7482   | 0.8706 | -0.006448 | 0.01663    | 0.003673  |
| <i>g__Rikenellaceae_RC9_gut_group</i>           | 0.02314   | 0.09816   | 0        | 0        | 0.163    | 0.5454 | 0         | 0.06941    | 0.02314   |
| <i>g__Howardella</i>                            | 0.002917  | 0.009003  | 0.01911  | 0.1024   | 0.6397   | 0.8322 | -0.05275  | 0.004483   | -0.01619  |
| <i>g__Colidextribacter</i>                      | 0.001555  | 0.002994  | 0.02024  | 0.0685   | 0.6787   | 0.8591 | -0.04496  | -0.0004362 | -0.01869  |
| <i>g__Sedimentibacter</i>                       | 0         | 0         | 0.02119  | 0.1289   | 0.5101   | 0.7918 | -0.06357  | 0          | -0.02119  |
| <i>g__norank_f__norank_o__Saccharimonadales</i> | 0.01303   | 0.03337   | 0.006716 | 0.01693  | 0.5738   | 0.8238 | -0.006764 | 0.02507    | 0.006311  |
| <i>g__Eubacterium</i>                           | 0.001167  | 0.003395  | 0.01826  | 0.05088  | 0.2097   | 0.5883 | -0.03507  | -0.00412   | -0.01709  |
| <i>g__norank_f__Eggerthellaceae</i>             | 0.002139  | 0.005519  | 0.01646  | 0.03594  | 0.2948   | 0.6735 | -0.02765  | -0.003405  | -0.01432  |
| <i>g__Solobacterium</i>                         | 0.014     | 0.02416   | 0.004162 | 0.008486 | 0.004981 | 0.175  | 0.001298  | 0.02372    | 0.009838  |
| <i>g__Porphyromonas</i>                         | 0.01322   | 0.04592   | 0.004919 | 0.01598  | 0.5547   | 0.8119 | -0.006674 | 0.03382    | 0.008303  |
| <i>g__Lachnospiraceae_UCG-003</i>               | 0.007     | 0.02481   | 0.01107  | 0.04127  | 0.6311   | 0.8287 | -0.02251  | 0.01459    | -0.004067 |
| <i>g__unclassified_k__norank_d__Bacteria</i>    | 0.008944  | 0.01933   | 0.008891 | 0.01569  | 0.5426   | 0.8028 | -0.009496 | 0.01134    | 5.26E-05  |
| <i>g__unclassified_f__Eggerthellaceae</i>       | 0.004278  | 0.009719  | 0.01163  | 0.0319   | 0.7818   | 0.8799 | -0.01899  | 0.002801   | -0.007357 |
| <i>g__Atopobium</i>                             | 0.01128   | 0.01807   | 0.00454  | 0.01088  | 0.1601   | 0.5454 | -0.001193 | 0.01683    | 0.006737  |
| <i>g__CHKCI002</i>                              | 0.0035    | 0.01485   | 0.01192  | 0.06571  | 0.7651   | 0.8775 | -0.03368  | 0.008324   | -0.008419 |



|                                           |          |          |          |          |          |        |            |           |           |
|-------------------------------------------|----------|----------|----------|----------|----------|--------|------------|-----------|-----------|
| <i>g__Peptoniphilus</i>                   | 0.007583 | 0.01515  | 0.007378 | 0.02135  | 0.648    | 0.8377 | -0.009518  | 0.009522  | 0.0002048 |
| <i>g__Eubacterium_nodatum_group</i>       | 0.009527 | 0.0171   | 0.005392 | 0.007676 | 0.918    | 0.9771 | -0.002654  | 0.01344   | 0.004136  |
| <i>g__Prevotellaceae_NK3B31_group</i>     | 0.009916 | 0.04207  | 0.00454  | 0.01718  | 0.5895   | 0.8238 | -0.008796  | 0.02861   | 0.005376  |
| <i>g__Anaerococcus</i>                    | 0.007972 | 0.02343  | 0.005959 | 0.02983  | 0.3724   | 0.7421 | -0.01322   | 0.01586   | 0.002012  |
| <i>g__Family_XIII_UCG-001</i>             | 0.004083 | 0.01311  | 0.009081 | 0.02744  | 0.6871   | 0.8659 | -0.01642   | 0.00503   | -0.004997 |
| <i>g__Peptostreptococcus</i>              | 0.008166 | 0.01067  | 0.004919 | 0.005801 | 0.5803   | 0.8238 | -0.001503  | 0.009197  | 0.003248  |
| <i>g__Moryella</i>                        | 0.004278 | 0.01186  | 0.008513 | 0.02177  | 0.2673   | 0.6475 | -0.01369   | 0.004451  | -0.004235 |
| <i>g__Acidaminococcus</i>                 | 0        | 0        | 0.01258  | 0.07652  | 0.5101   | 0.7918 | -0.03774   | 0         | -0.01258  |
| <i>g__unclassified_f__Pasteurellaceae</i> | 0.005444 | 0.02138  | 0.006527 | 0.02417  | 0.398    | 0.7876 | -0.01305   | 0.01108   | -0.001083 |
| <i>g__Staphylococcus</i>                  | 0.004278 | 0.01563  | 0.007283 | 0.03905  | 0.8938   | 0.955  | -0.01849   | 0.01033   | -0.003006 |
| <i>g__Corynebacterium</i>                 | 0.006805 | 0.009021 | 0.004635 | 0.01281  | 0.1894   | 0.5786 | -0.003868  | 0.00804   | 0.00217   |
| <i>g__norank_f__UCG-010</i>               | 0        | 0        | 0.01126  | 0.03372  | 0.02499  | 0.3055 | -0.02384   | -0.002459 | -0.01126  |
| <i>g__Holdemania</i>                      | 0.00175  | 0.004201 | 0.00927  | 0.01338  | 0.007685 | 0.2065 | -0.01179   | -0.003148 | -0.00752  |
| <i>g__F0332</i>                           | 0.006611 | 0.0127   | 0.003594 | 0.005803 | 0.7828   | 0.8799 | -0.002018  | 0.009727  | 0.003016  |
| <i>g__Candidatus_Stoquefichus</i>         | 0.006611 | 0.02635  | 0.003594 | 0.01677  | 0.8647   | 0.9345 | -0.008219  | 0.01829   | 0.003017  |
| <i>g__Scardovia</i>                       | 0.007194 | 0.02793  | 0.002365 | 0.004743 | 0.3377   | 0.6876 | -0.003016  | 0.01929   | 0.004829  |
| <i>g__Coprobacillus</i>                   | 0.008166 | 0.02086  | 0.00123  | 0.003423 | 0.4714   | 0.7918 | -0.0008092 | 0.01754   | 0.006937  |
| <i>g__Pediococcus</i>                     | 0        | 0        | 0.008513 | 0.04832  | 0.2271   | 0.5883 | -0.02497   | 0         | -0.008514 |

|                                                          |           |           |           |           |         |        |            |            |            |
|----------------------------------------------------------|-----------|-----------|-----------|-----------|---------|--------|------------|------------|------------|
| <i>g__Candidatus_Soleaferrea</i>                         | 0.002917  | 0.004532  | 0.005486  | 0.007494  | 0.2858  | 0.6638 | -0.005644  | 0.0005047  | -0.00257   |
| <i>g__Delftia</i>                                        | 0         | 0         | 0.008324  | 0.05004   | 0.3331  | 0.6833 | -0.02488   | 0          | -0.008324  |
| <i>g__Paraeggerthella</i>                                | 0         | 0         | 0.007756  | 0.03882   | 0.3331  | 0.6833 | -0.02176   | 0          | -0.007757  |
| <i>g__norank_f__norank_o__Clostridia_vadinBB60_group</i> | 0.007388  | 0.03135   | 0         | 0         | 0.163   | 0.5454 | 0          | 0.02217    | 0.007389   |
| <i>g__Aggregatibacter</i>                                | 0.003889  | 0.01025   | 0.003405  | 0.01784   | 0.5153  | 0.7918 | -0.006958  | 0.007116   | 0.0004834  |
| <i>g__Enorma</i>                                         | 0.0003889 | 0.001132  | 0.006905  | 0.02344   | 0.7216  | 0.8706 | -0.01523   | -8.94E-05  | -0.006517  |
| <i>g__DTU089</i>                                         | 0.0001944 | 0.0008249 | 0.007     | 0.01738   | 0.025   | 0.3055 | -0.01248   | -0.002076  | -0.006806  |
| <i>g__Oribacterium</i>                                   | 0.003694  | 0.01001   | 0.003121  | 0.007596  | 0.9635  | 1      | -0.003668  | 0.006101   | 0.0005728  |
| <i>g__Pseudomonas</i>                                    | 0         | 0         | 0.006716  | 0.04085   | 0.5101  | 0.7918 | -0.02015   | 0          | -0.006716  |
| <i>g__Christensenella</i>                                | 0.0009722 | 0.002632  | 0.005581  | 0.01108   | 0.08674 | 0.4599 | -0.008508  | -0.0009825 | -0.004609  |
| <i>g__Megasphaera</i>                                    | 0.001361  | 0.004006  | 0.005013  | 0.01855   | 0.8043  | 0.8863 | -0.01047   | 0.001613   | -0.003652  |
| <i>g__Finegoldia</i>                                     | 0.002917  | 0.007424  | 0.003311  | 0.009931  | 0.347   | 0.6999 | -0.004887  | 0.004241   | -0.0003942 |
| <i>g__norank_f__Prevotellaceae</i>                       | 0.006027  | 0.02471   | 0         | 0         | 0.04353 | 0.3379 | 0          | 0.01789    | 0.006028   |
| <i>g__norank_f__Peptococcaceae</i>                       | 0.001167  | 0.004158  | 0.004824  | 0.01951   | 0.5984  | 0.8238 | -0.01126   | 0.001471   | -0.003657  |
| <i>g__Acetitomaculum</i>                                 | 0.0001944 | 0.0008249 | 0.00577   | 0.0311    | 0.5173  | 0.7918 | -0.01646   | 0.0001997  | -0.005576  |
| <i>g__Bacillus</i>                                       | 0         | 0         | 0.005959  | 0.03566   | 0.3331  | 0.6833 | -0.01778   | 0          | -0.00596   |
| <i>g__Morganella</i>                                     | 0.005833  | 0.02475   | 9.46E-05  | 0.0005754 | 0.5993  | 0.8238 | -0.0002838 | 0.0175     | 0.005739   |
| <i>g__norank_f__norank_o__Coriobacteriales</i>           | 0.005055  | 0.01757   | 0.0008513 | 0.004623  | 0.4373  | 0.7918 | -0.001608  | 0.0142     | 0.004204   |

|                                     |           |           |           |           |          |        |            |            |           |
|-------------------------------------|-----------|-----------|-----------|-----------|----------|--------|------------|------------|-----------|
| <i>g__Sutterella</i>                | 0.001361  | 0.00497   | 0.004351  | 0.01247   | 0.2531   | 0.635  | -0.007473  | 0.001324   | -0.00299  |
| <i>g__Peptococcus</i>               | 0.004083  | 0.01647   | 0.001419  | 0.004981  | 0.8404   | 0.9154 | -0.002922  | 0.01091    | 0.002664  |
| <i>g__Parvimonas</i>                | 0.003111  | 0.006225  | 0.002365  | 0.004522  | 0.7754   | 0.8785 | -0.002071  | 0.004104   | 0.0007462 |
| <i>g__Paludicola</i>                | 0.0003889 | 0.001132  | 0.004635  | 0.008654  | 0.04055  | 0.3379 | -0.007     | -0.001965  | -0.004246 |
| <i>g__Anaerotruncus</i>             | 0.0001944 | 0.0008249 | 0.00454   | 0.008202  | 0.002806 | 0.175  | -0.007368  | -0.001976  | -0.004346 |
| <i>g__Enterorhabdus</i>             | 0.0009722 | 0.004125  | 0.003405  | 0.02013   | 1        | 1      | -0.009933  | 0.002728   | -0.002433 |
| <i>g__Anaerofustis</i>              | 0.0009722 | 0.003354  | 0.003311  | 0.01218   | 0.2091   | 0.5883 | -0.007147  | 0.0009355  | -0.002339 |
| <i>g__Epulopiscium</i>              | 0.003889  | 0.01229   | 0.0001892 | 0.001151  | 0.194    | 0.5799 | -0.0003784 | 0.01011    | 0.0037    |
| <i>g__UCG-009</i>                   | 0         | 0         | 0.003973  | 0.01204   | 0.05285  | 0.3714 | -0.009082  | -0.0009459 | -0.003973 |
| <i>g__Sporosarcina</i>              | 0         | 0         | 0.003689  | 0.02244   | 0.5101   | 0.7918 | -0.01107   | 0          | -0.003689 |
| <i>g__Defluviitaleaceae_UCG-011</i> | 0         | 0         | 0.003689  | 0.01027   | 0.05286  | 0.3714 | -0.007189  | -0.0008513 | -0.003689 |
| <i>g__Oxalobacter</i>               | 0         | 0         | 0.003689  | 0.01773   | 0.2271   | 0.5883 | -0.01003   | 0          | -0.003689 |
| <i>g__Negativicoccus</i>            | 0.0009722 | 0.002632  | 0.002649  | 0.01611   | 0.07624  | 0.4357 | -0.007556  | 0.001944   | -0.001676 |
| <i>g__Oscillospira</i>              | 0         | 0         | 0.003594  | 0.02186   | 0.5101   | 0.7918 | -0.01079   | 0          | -0.003595 |
| <i>g__Frisingicoccus</i>            | 0.003111  | 0.0132    | 0.0003784 | 0.001804  | 0.9636   | 1      | -0.0008514 | 0.009239   | 0.002733  |
| <i>g__Allisonella</i>               | 0.0003889 | 0.001132  | 0.003027  | 0.01014   | 0.2917   | 0.672  | -0.006327  | -0.0001839 | -0.002638 |
| <i>g__Shuttleworthia</i>            | 0.003111  | 0.006225  | 0.0002838 | 0.0009685 | 0.01413  | 0.2336 | 0.0003994  | 0.006033   | 0.002827  |
| <i>g__Ezakiella</i>                 | 0.002139  | 0.006019  | 0.00123   | 0.003709  | 1        | 1      | -0.001776  | 0.004104   | 0.0009092 |

|                                                      |           |           |           |           |         |        |            |            |            |
|------------------------------------------------------|-----------|-----------|-----------|-----------|---------|--------|------------|------------|------------|
| <i>g__Lachnospiraceae_FCS020_group</i>               | 0.001361  | 0.003425  | 0.001986  | 0.005317  | 0.7287  | 0.8706 | -0.002833  | 0.00185    | -0.0006253 |
| <i>g__Catenibacillus</i>                             | 0.0009722 | 0.003354  | 0.002365  | 0.004953  | 0.1921  | 0.5799 | -0.003568  | 0.0008093  | -0.001393  |
| <i>g__Sneathia</i>                                   | 0.002333  | 0.009899  | 0.0009459 | 0.004178  | 0.7957  | 0.8803 | -0.001986  | 0.006811   | 0.001387   |
| <i>g__S5-A14a</i>                                    | 0.002333  | 0.009899  | 0.0005675 | 0.002105  | 0.7957  | 0.8803 | -0.00104   | 0.006622   | 0.001766   |
| <i>g__GCA-900066575</i>                              | 0.0001944 | 0.0008249 | 0.002554  | 0.006371  | 0.05881 | 0.3888 | -0.00473   | -0.0006516 | -0.00236   |
| <i>g__Anaeroglobus</i>                               | 0.0001944 | 0.0008249 | 0.002459  | 0.0138    | 0.7348  | 0.8706 | -0.007189  | 0.0003889  | -0.002265  |
| <i>g__Cloacibacillus</i>                             | 0         | 0         | 0.002459  | 0.008646  | 0.1573  | 0.5454 | -0.005676  | -0.0001892 | -0.002459  |
| <i>g__Fastidiosipila</i>                             | 0.002333  | 0.009899  | 0         | 0         | 0.163   | 0.5454 | 0          | 0.007      | 0.002333   |
| <i>g__norank_f__norank_o__MBA03</i>                  | 0.001361  | 0.005774  | 0.0009459 | 0.005194  | 1       | 1      | -0.002554  | 0.004084   | 0.0004153  |
| <i>g__Stenotrophomonas</i>                           | 0         | 0         | 0.002176  | 0.01323   | 0.5101  | 0.7918 | -0.006527  | 0          | -0.002176  |
| <i>g__Gardnerella</i>                                | 0.0003889 | 0.00165   | 0.001703  | 0.007221  | 0.7051  | 0.8706 | -0.004541  | 0.0007778  | -0.001314  |
| <i>g__unclassified_o__Bacteroidales</i>              | 0.0001944 | 0.0008249 | 0.001892  | 0.01039   | 1       | 1      | -0.005297  | 0.0003942  | -0.001697  |
| <i>g__norank_f__Christensenellaceae</i>              | 0         | 0         | 0.002081  | 0.004323  | 0.01132 | 0.2065 | -0.003595  | -0.0009459 | -0.002081  |
| <i>g__Burkholderia-Caballeronia-Paraburkholderia</i> | 0.00175   | 0.004688  | 0.0001892 | 0.0008023 | 0.1606  | 0.5454 | -0.0001892 | 0.003904   | 0.001561   |
| <i>g__Pseudopropionibacterium</i>                    | 0.001361  | 0.002721  | 0.0005675 | 0.001937  | 0.2417  | 0.6174 | -0.0005623 | 0.002239   | 0.0007935  |
| <i>g__norank_f__norank_o__Oscillospirales</i>        | 0.0009722 | 0.003354  | 0.0009459 | 0.002281  | 0.5213  | 0.7918 | -0.001324  | 0.002071   | 2.63E-05   |
| <i>g__Enhydrobacter</i>                              | 0         | 0         | 0.001892  | 0.01093   | 0.3331  | 0.6833 | -0.005581  | 0          | -0.001892  |
| <i>g__Propionibacterium</i>                          | 0.001167  | 0.002684  | 0.0006621 | 0.001993  | 0.4183  | 0.7918 | -0.0007358 | 0.002049   | 0.0005045  |

|                                                              |           |           |           |           |        |        |            |            |            |
|--------------------------------------------------------------|-----------|-----------|-----------|-----------|--------|--------|------------|------------|------------|
| <i>g__Campylobacter</i>                                      | 0.001361  | 0.005774  | 0.0003784 | 0.001376  | 0.7957 | 0.8803 | -0.0007567 | 0.003989   | 0.0009827  |
| <i>g__Eubacterium_saphenum_group</i>                         | 0.0005833 | 0.001342  | 0.001135  | 0.002743  | 0.8782 | 0.9455 | -0.001598  | 0.0005938  | -0.0005518 |
| <i>g__Intestinimonas</i>                                     | 0         | 0         | 0.001608  | 0.005509  | 0.1573 | 0.5454 | -0.003595  | -0.0001892 | -0.001608  |
| <i>g__unclassified_f__Anaerovoracaceae</i>                   | 0         | 0         | 0.001608  | 0.009781  | 0.5101 | 0.7918 | -0.004824  | 0          | -0.001608  |
| <i>g__Harryflintia</i>                                       | 0         | 0         | 0.001608  | 0.005809  | 0.1573 | 0.5454 | -0.003689  | -9.46E-05  | -0.001608  |
| <i>g__Fournierella</i>                                       | 0         | 0         | 0.001513  | 0.009206  | 0.5101 | 0.7918 | -0.004541  | 0          | -0.001514  |
| <i>g__Wolbachia</i>                                          | 0.0007777 | 0.0033    | 0.0006621 | 0.002838  | 0.9818 | 1      | -0.001419  | 0.001955   | 0.0001156  |
| <i>g__Pyramidobacter</i>                                     | 0.0003889 | 0.00165   | 0.00104   | 0.003388  | 0.529  | 0.7992 | -0.001892  | 0.0006096  | -0.0006516 |
| <i>g__Brevundimonas</i>                                      | 0.0001944 | 0.0008249 | 0.00123   | 0.006912  | 1      | 1      | -0.0035    | 0.0003941  | -0.001035  |
| <i>g__unclassified_f__Actinomycetaceae</i>                   | 0.0005833 | 0.001801  | 0.0007567 | 0.001869  | 0.6499 | 0.8377 | -0.001135  | 0.0009827  | -0.0001734 |
| <i>g__Anoxybacillus</i>                                      | 0.0001944 | 0.0008249 | 0.00104   | 0.005208  | 0.7348 | 0.8706 | -0.002838  | 0.0003889  | -0.0008461 |
| <i>g__norank_f__Neisseriaceae</i>                            | 0.001167  | 0.004949  | 0         | 0         | 0.163  | 0.5454 | 0          | 0.0035     | 0.001167   |
| <i>g__Allorhizobium-Neorhizobium-Pararhizobium-Rhizobium</i> | 0         | 0         | 0.001135  | 0.005778  | 0.2271 | 0.5883 | -0.003122  | 0          | -0.001135  |
| <i>g__UCG-007</i>                                            | 0         | 0         | 0.00104   | 0.005208  | 0.2271 | 0.5883 | -0.002743  | 0          | -0.001041  |
| <i>g__Hydrogenoanaerobacterium</i>                           | 0.0007777 | 0.0033    | 0.0001892 | 0.001151  | 0.5993 | 0.8238 | -0.0003784 | 0.002333   | 0.0005886  |
| <i>g__Aerococcus</i>                                         | 0         | 0         | 0.0009459 | 0.005194  | 0.3331 | 0.6833 | -0.002743  | 0          | -0.0009459 |
| <i>g__unclassified_o__Saccharimonadales</i>                  | 0.0007777 | 0.002562  | 9.46E-05  | 0.0005754 | 0.2019 | 0.5883 | -0.0001892 | 0.002139   | 0.0006831  |
| <i>g__Murdochella</i>                                        | 0.0003889 | 0.00165   | 0.0004729 | 0.001874  | 0.7651 | 0.8775 | -0.0009459 | 0.0008829  | -8.41E-05  |

|                                                      |           |           |           |           |         |        |            |           |            |
|------------------------------------------------------|-----------|-----------|-----------|-----------|---------|--------|------------|-----------|------------|
| <i>g__Serratia</i>                                   | 0.0003889 | 0.001132  | 0.0004729 | 0.001467  | 1       | 1      | -0.0007568 | 0.0006884 | -8.41E-05  |
| <i>g__Leuconostoc</i>                                | 0.0005833 | 0.001801  | 0.0001892 | 0.0008023 | 0.4371  | 0.7918 | -0.0002838 | 0.001366  | 0.0003941  |
| <i>g__Parascardovia</i>                              | 0.0005833 | 0.001342  | 0.0001892 | 0.0008023 | 0.1826  | 0.5786 | -0.0001892 | 0.001072  | 0.0003941  |
| <i>g__Lachnoanaerobaculum</i>                        | 0.0001944 | 0.0008249 | 0.0005675 | 0.001308  | 0.2769  | 0.6621 | -0.0009407 | 0.0002049 | -0.0003731 |
| <i>g__Mobiluncus</i>                                 | 0.0001944 | 0.0008249 | 0.0005675 | 0.001753  | 0.5172  | 0.7918 | -0.001135  | 0.0002943 | -0.0003731 |
| <i>g__norank_f__norank_o__Bacteroidales</i>          | 0         | 0         | 0.0007567 | 0.004053  | 0.3331  | 0.6833 | -0.002176  | 0         | -0.0007568 |
| <i>g__Tsukamurella</i>                               | 0         | 0         | 0.0007567 | 0.004603  | 0.5101  | 0.7918 | -0.00227   | 0         | -0.0007568 |
| <i>g__norank_f__norank_o__norank_c__RBG-16-55-12</i> | 0.0005833 | 0.002475  | 9.46E-05  | 0.0005754 | 0.5993  | 0.8238 | -0.0002838 | 0.00175   | 0.0004888  |
| <i>g__Candidatus_Caldatribacterium</i>               | 0.0003889 | 0.00165   | 0.0002838 | 0.001726  | 0.6383  | 0.8322 | -0.0008513 | 0.001167  | 0.0001051  |
| <i>g__Anaerofilum</i>                                | 0         | 0         | 0.0006621 | 0.001814  | 0.1094  | 0.5122 | -0.001324  | -9.46E-05 | -0.0006621 |
| <i>g__unclassified_o__Oscillospirales</i>            | 0         | 0         | 0.0006621 | 0.002157  | 0.1573  | 0.5454 | -0.001419  | 0         | -0.0006622 |
| <i>g__Candidatus_Saccharimonas</i>                   | 0.0005833 | 0.001801  | 0         | 0         | 0.04353 | 0.3379 | 0          | 0.001361  | 0.0005833  |
| <i>g__Cryptobacterium</i>                            | 0.0005833 | 0.001801  | 0         | 0         | 0.04353 | 0.3379 | 0          | 0.001556  | 0.0005833  |
| <i>g__Mycobacterium</i>                              | 0.0005833 | 0.002475  | 0         | 0         | 0.163   | 0.5454 | 0          | 0.00175   | 0.0005833  |
| <i>g__Acetanaerobacterium</i>                        | 0.0003889 | 0.001132  | 0.0001892 | 0.0008023 | 0.4607  | 0.7918 | -0.0002838 | 0.0008776 | 0.0001997  |
| <i>g__unclassified_f__Christensenellaceae</i>        | 0.0001944 | 0.0008249 | 0.0003784 | 0.001102  | 0.5403  | 0.8028 | -0.0006621 | 0.0003889 | -0.0001839 |
| <i>g__Clavibacter</i>                                | 0.0001944 | 0.0008249 | 0.0003784 | 0.001376  | 0.7348  | 0.8706 | -0.0007567 | 0.0003942 | -0.0001839 |
| <i>g__norank_f__Prolixibacteraceae</i>               | 0.0003889 | 0.00165   | 9.46E-05  | 0.0005754 | 0.5993  | 0.8238 | -0.0002838 | 0.001167  | 0.0002943  |

|                                                      |           |           |           |           |        |        |            |           |            |
|------------------------------------------------------|-----------|-----------|-----------|-----------|--------|--------|------------|-----------|------------|
| <i>g__norank_f__Bacteroidales_UCG-001</i>            | 0.0003889 | 0.00165   | 9.46E-05  | 0.0005754 | 0.5993 | 0.8238 | -0.0001892 | 0.001167  | 0.0002943  |
| <i>g__Anaerostignum</i>                              | 0.0001944 | 0.0008249 | 0.0002838 | 0.0009685 | 0.7497 | 0.8706 | -0.0005676 | 0.0003941 | -8.94E-05  |
| <i>g__Dielma</i>                                     | 0.0001944 | 0.0008249 | 0.0002838 | 0.0009685 | 0.7497 | 0.8706 | -0.0005676 | 0.0003941 | -8.94E-05  |
| <i>g__Marmoricola</i>                                | 0.0001944 | 0.0008249 | 0.0002838 | 0.0009685 | 0.7497 | 0.8706 | -0.0005624 | 0.0003941 | -8.94E-05  |
| <i>g__Phoceia</i>                                    | 0         | 0         | 0.0004729 | 0.001874  | 0.2271 | 0.5883 | -0.001135  | 0         | -0.000473  |
| <i>g__Coprobacter</i>                                | 0         | 0         | 0.0004729 | 0.001467  | 0.1572 | 0.5454 | -0.000946  | -9.46E-05 | -0.000473  |
| <i>g__Macrococcus</i>                                | 0.0001944 | 0.0008249 | 0.0001892 | 0.0008023 | 1      | 1      | -0.0003784 | 0.0004888 | 5.26E-06   |
| <i>g__Coriobacteriaceae_UCG-002</i>                  | 0         | 0         | 0.0003784 | 0.002301  | 0.5101 | 0.7918 | -0.001135  | 0         | -0.0003784 |
| <i>g__Brucella</i>                                   | 0         | 0         | 0.0003784 | 0.001804  | 0.3331 | 0.6833 | -0.001041  | 0         | -0.0003784 |
| <i>g__DNF00809</i>                                   | 0         | 0         | 0.0003784 | 0.001605  | 0.333  | 0.6833 | -0.0009459 | 0         | -0.0003784 |
| <i>g__norank_f__norank_o__Rhodospirillales</i>       | 0         | 0         | 0.0003784 | 0.002301  | 0.5101 | 0.7918 | -0.001135  | 0         | -0.0003784 |
| <i>g__norank_f__Desulfovibrionaceae</i>              | 0         | 0         | 0.0003784 | 0.002301  | 0.5101 | 0.7918 | -0.001135  | 0         | -0.0003784 |
| <i>g__norank_f__Clostridium_methylpentosum_group</i> | 0         | 0         | 0.0003784 | 0.002301  | 0.5101 | 0.7918 | -0.001135  | 0         | -0.0003784 |
| <i>g__Caldicoprobacter</i>                           | 0.0001944 | 0.0008249 | 9.46E-05  | 0.0005754 | 0.6186 | 0.8238 | -0.0002838 | 0.0005834 | 9.99E-05   |
| <i>g__Lawsonella</i>                                 | 0.0001944 | 0.0008249 | 9.46E-05  | 0.0005754 | 0.6186 | 0.8238 | -0.0002838 | 0.0005833 | 9.98E-05   |
| <i>g__Merdibacter</i>                                | 0.0001944 | 0.0008249 | 9.46E-05  | 0.0005754 | 0.6186 | 0.8238 | -0.0002838 | 0.0005833 | 9.98E-05   |
| <i>g__Eggerthia</i>                                  | 0.0001944 | 0.0008249 | 9.46E-05  | 0.0005754 | 0.6186 | 0.8238 | -0.0002838 | 0.0005834 | 9.99E-05   |
| <i>g__unclassified_f__Comamonadaceae</i>             | 0         | 0         | 0.0002838 | 0.001726  | 0.5101 | 0.7918 | -0.0008513 | 0         | -0.0002838 |

|                                                      |           |           |           |           |        |        |            |           |            |
|------------------------------------------------------|-----------|-----------|-----------|-----------|--------|--------|------------|-----------|------------|
| <i>g__norank_f__norank_o__RBG-13-54-9</i>            | 0         | 0         | 0.0002838 | 0.001726  | 0.5101 | 0.7918 | -0.0008513 | 0         | -0.0002838 |
| <i>g__Pseudarthrobacter</i>                          | 0         | 0         | 0.0002838 | 0.0009685 | 0.2269 | 0.5883 | -0.0006621 | 0         | -0.0002838 |
| <i>g__Cellulosilyticum</i>                           | 0.0001944 | 0.0008249 | 0         | 0         | 0.163  | 0.5454 | 0          | 0.0005833 | 0.0001944  |
| <i>g__Lentimicrobium</i>                             | 0.0001944 | 0.0008249 | 0         | 0         | 0.163  | 0.5454 | 0          | 0.0005834 | 0.0001945  |
| <i>g__Parvibacter</i>                                | 0         | 0         | 0.0001892 | 0.001151  | 0.5101 | 0.7918 | -0.0007568 | 0         | -0.0001892 |
| <i>g__Bulleidia</i>                                  | 0         | 0         | 0.0001892 | 0.001151  | 0.5101 | 0.7918 | -0.0007567 | 0         | -0.0001892 |
| <i>g__Empedobacter</i>                               | 0         | 0         | 0.0001892 | 0.001151  | 0.5101 | 0.7918 | -0.0005676 | 0         | -0.0001892 |
| <i>g__norank_f__Erysipelotrichaceae</i>              | 0         | 0         | 9.46E-05  | 0.0005754 | 0.5101 | 0.7918 | -0.0002838 | 0         | -9.46E-05  |
| <i>g__norank_f__norank_o__norank_c__Anaerolineae</i> | 0         | 0         | 9.46E-05  | 0.0005754 | 0.5101 | 0.7918 | -0.0002838 | 0         | -9.46E-05  |
| <i>g__Johnsonella</i>                                | 0         | 0         | 9.46E-05  | 0.0005754 | 0.5101 | 0.7918 | -0.0002838 | 0         | -9.46E-05  |
| <i>g__norank_f__Bacteroidetes_vadinHA17</i>          | 0         | 0         | 9.46E-05  | 0.0005754 | 0.5101 | 0.7918 | -0.0003784 | 0         | -9.46E-05  |
| <i>g__norank_f__UCG-011</i>                          | 0         | 0         | 9.46E-05  | 0.0005754 | 0.5101 | 0.7918 | -0.0002838 | 0         | -9.46E-05  |
| <i>g__unclassified_f__Rhizobiaceae</i>               | 0         | 0         | 9.46E-05  | 0.0005754 | 0.5101 | 0.7918 | -0.0002838 | 0         | -9.46E-05  |
| <i>g__Victivallis</i>                                | 0         | 0         | 9.46E-05  | 0.0005754 | 0.5101 | 0.7918 | -0.0002838 | 0         | -9.46E-05  |
| <i>g__norank_f__Flavobacteriaceae</i>                | 0         | 0         | 9.46E-05  | 0.0005754 | 0.5101 | 0.7918 | -0.0002838 | 0         | -9.46E-05  |

Notes: Wilcoxon rank-sum test was used corrected for multiple testing using the Benjamini-Hochberg FDR method. DBC, depressed breast cancer patients (n = 18);

NBC, non-depressed breast cancer patients (n = 37).



Table S7. Linear regression analyses of the associations between diet and gut microbiota (n = 55).

| Variables     | Chao index     |       |                 |              | Shannon index  |        |               |              | Simpson index  |        |               |       |
|---------------|----------------|-------|-----------------|--------------|----------------|--------|---------------|--------------|----------------|--------|---------------|-------|
|               | R <sup>2</sup> | β     | 95%CI           | P            | R <sup>2</sup> | β      | 95%CI         | P            | R <sup>2</sup> | β      | 95%CI         | P     |
| Protein       | 0.181          | 0.229 | −0.177, 1.323   | 0.131        | 0.175          | 0.150  | −0.004, 0.012 | 0.323        | 0.091          | −0.084 | −0.002, 0.001 | 0.594 |
| Dietary fiber | 0.138          | 0.021 | −3.785, 4.306   | 0.897        | 0.169          | 0.132  | −0.025, 0.060 | 0.411        | 0.104          | −0.158 | −0.012, 0.004 | 0.346 |
| Vitamin A     | 0.195          | 0.265 | −0.008, 0.137   | 0.082        | 0.177          | 0.156  | 0.000, 0.001  | 0.305        | 0.101          | −0.139 | 0.000, 0.000  | 0.381 |
| Vitamin B2    | 0.166          | 0.188 | −11.999, 49.729 | 0.225        | 0.159          | −0.053 | −0.388, 0.275 | 0.731        | 0.111          | 0.176  | −0.029, 0.100 | 0.270 |
| Niacin        | 0.157          | 0.158 | −1.876, 5.694   | 0.315        | 0.165          | 0.102  | −0.027, 0.053 | 0.513        | 0.089          | −0.071 | −0.010, 0.006 | 0.664 |
| Calcium       | 0.212          | 0.305 | 0.001, 0.135    | <b>0.048</b> | 0.236          | 0.316  | 0.000, 0.001  | <b>0.038</b> | 0.135          | −0.248 | 0.000, 0.000  | 0.121 |
| Phosphorus    | 0.214          | 0.313 | 0.002, 0.128    | <b>0.044</b> | 0.191          | 0.211  | 0.000, 0.001  | 0.176        | 0.098          | −0.128 | 0.000, 0.000  | 0.432 |
| Potassium     | 0.163          | 0.188 | −0.011, 0.041   | 0.249        | 0.204          | 0.255  | 0.000, 0.000  | 0.111        | 0.117          | −0.207 | 0.000, 0.000  | 0.217 |
| Iron          | 0.172          | 0.217 | −1.080, 5.512   | 0.182        | 0.209          | 0.267  | −0.005, 0.064 | 0.094        | 0.139          | −0.271 | −0.012, 0.001 | 0.104 |
| Zinc          | 0.194          | 0.268 | −0.704, 10.502  | 0.085        | 0.225          | 0.295  | −0.001, 0.116 | 0.054        | 0.152          | −0.291 | −0.022, 0.001 | 0.069 |
| Selenium      | 0.198          | 0.275 | −0.082, 1.604   | 0.076        | 0.252          | 0.347  | 0.002, 0.019  | <b>0.022</b> | 0.134          | −0.246 | −0.003, 0.000 | 0.124 |

|                  |       |       |                |              |       |       |               |              |       |        |                |              |
|------------------|-------|-------|----------------|--------------|-------|-------|---------------|--------------|-------|--------|----------------|--------------|
| Manganese        | 0.139 | 0.048 | −8.350, 11.186 | 0.832        | 0.166 | 0.116 | −0.066, 0.139 | 0.477        | 0.099 | −0.137 | −0.028, 0.012  | 0.419        |
| Total CHEI score | 0.248 | 0.387 | 0.683, 5.839   | <b>0.014</b> | 0.258 | 0.369 | 0.006, 0.061  | <b>0.018</b> | 0.221 | −0.426 | −0.013, −0.002 | <b>0.008</b> |

---

Notes: The linear regression models were used after adjusting by age, BMI, family monthly income, education level, menopausal status, marital status, employment, residence and SAS score. CHEI, Chinese Healthy Eating Index.
